# Supplementary material for: SnO2-supported single metal atoms: a bifunctional catalyst for the electrochemical synthesis of H2O2
Source: Royal Society of Chemistry journal article supplement (doi:10.1039/d1ta07562d), 2021-11-25
Supplement: d1ta07562d1.pdf [file d1ta07562d1.pdf]

## **Supplementary information**

### **SnO<sub>2</sub>-supported single metal atoms: A Bifunctional Catalyst for the Electrochemical Synthesis of H<sub>2</sub>O<sub>2</sub>**

Santiago Jimenez-Villegas,<sup>a</sup> Sara R. Kelly,<sup>b</sup> and Samira Siahrostami \*<sup>a</sup>

## Computational details

### Calculation of adsorption free energy

Catalytic activity of the SnO<sub>2</sub>- supported single metal atoms was assessed via binding energies of reaction intermediates involved in the 2e- WOR and ORR. Namely, adsorption free energies,  $\Delta G$ , of OH\* and OOH\* over two different surface-active sites (atop the single metal atom and on an adjacent Sn site) was explored.  $\Delta G$  was calculated at zero potential and pH=0, using the following equation:

$$\Delta G = \Delta E + \Delta ZPE - T\Delta S$$

Where  $\Delta E$ ,  $\Delta ZPE$ , and  $\Delta S$  are adsorption energies with respect to water, zero-point energy difference and change in entropy, respectively.<sup>1</sup>

Additionally, the computational hydrogen electrode model (CHE) was implemented to calculate the free energy of all adsorbates. This approach assumes the chemical potential of a proton-electron pair to be equal to that of gas phase H<sub>2</sub> at  $U_{elec}=0.0$  V vs. the reversible hydrogen electrode (RHE). By shifting the electron energy by  $-eU_{elec}$  when  $e$  and  $U_{elec}$  are the elementary charge and electrode potential, respectively, the effect of the electrode potential is taken into account.<sup>1</sup>

### Stability calculations

Stability of SnO<sub>2</sub>- supported single metal atoms was investigated via formation energy calculations and resistance to dissolution. Formation energies were calculated through the following equation:<sup>2</sup>

$$\Delta E_{form} = E_{M-Supp} - E_M - E_{Supp}$$

Where  $E_{M-Supp}$ ,  $E_M$ ,  $E_{Supp}$  are electronic energies of metal-support complex, bulk metal atom and support materials, respectively. Dissolution potential were calculated using the following:

$$U_{diss(Metal,SAC)} = U_{diss(Metal,Bulk)} - \frac{\mu_{Metal,SAC} - \mu_{Metal,Bulk}}{ne}$$

where  $U_{diss(Metal,Bulk)}$ ,  $\mu_{Metal,SAC}$ ,  $\mu_{Metal,Bulk}$ , and  $n$  are the dissolution potential of bulk metals, the chemical potential of metal atom in SAC system, that of bulk metal, and the number of electrons involved in the dissolution, respectively.  $\mu_{Metal,SAC}$  were calculated as  $E_{M-Supp}$ .<sup>2,3</sup>

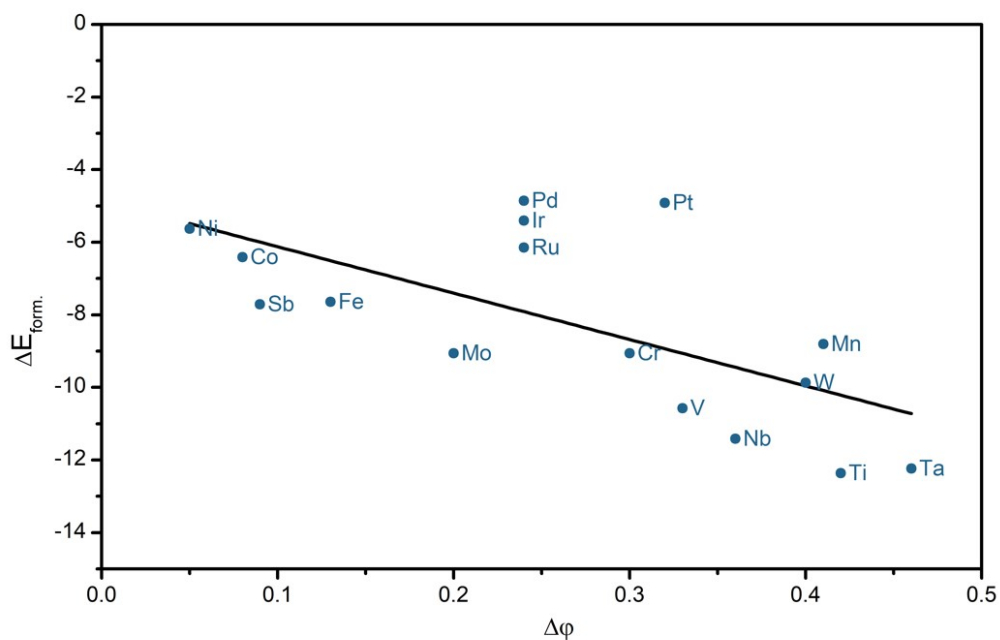

**Figure 1.**  $\Delta E_{\text{form}}$  of  $\text{SnO}_2$ -supported single metal atoms as a function of the electronegativity

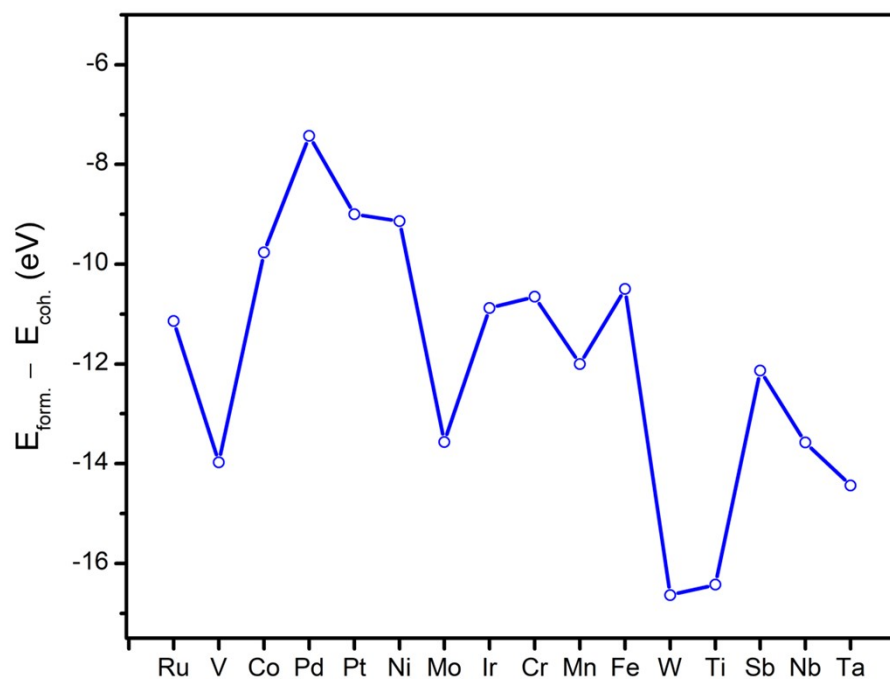

difference ( $\Delta\phi$ ) between Sn and single metal atom. Black line represents linear fit.

**Figure 2.** Difference between formation energy of the single metal with the  $\text{SnO}_2$  support ( $E_{\text{form.}}$ ) and cohesive energy ( $E_{\text{coh.}}$ ) of the metal bulk.  $E_{\text{coh.}}$  values were obtained from ref. <sup>4,5</sup>

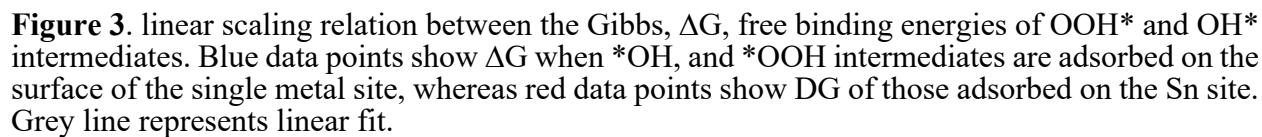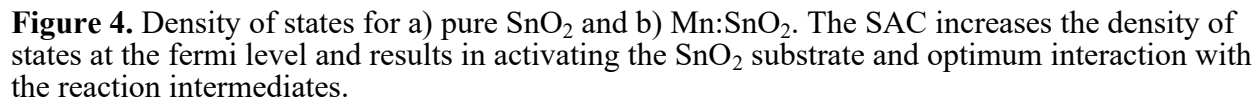

## References

- 1 J. K. Nørskov, J. Rossmeisl, A. Logadottir, L. Lindqvist, J. R. Kitchin, T. Bligaard and H. Jónsson, *J. Phys. Chem. B*, 2004, **108**, 17886–17892.
- 2 S. Back, A. R. Kulkarni and S. Siahrostami, *ChemCatChem*, 2018, **10**, 3034–3039.
- 3 J. Greeley and J. K. Nørskov, *Electrochim. Acta*, 2007, **52**, 5829–5836.
- 4 P. Janthon, S. Luo, S. M. Kozlov, F. Viñes, J. Limtrakul, D. G. Truhlar and F. Illas, *J. Chem. Theory Comput.*, 2014, **10**, 3832–3839.
- 5 Z. T. Y. Liu, X. Zhou, S. V. Khare and D. Gall, *J. Phys. Condens. Matter*, , DOI:10.1088/0953-8984/26/2/025404.
